# Supplementary material for: Evolution of Mitochondrially Derived Peptides Humanin and MOTSc, and Changes in Insulin Sensitivity during Early Gestation in Women with and without Gestational Diabetes
Source: MDPI journal article supplement (doi:10.3390/jcm11113003), 2022-05-26
Supplement: s1 [file s1]

**Evolution of mitochondrial-derived peptides, humanin and MOTSc and changes in insulin sensitivity during early gestation**

***Supplementary material***

## Supplementary files

**Supplementary Table S1.** Mitochondrial-derived peptides (MDPs) in the first and second trimesters of gestation in GDM (cases) and controls

| <i>Variables</i>                                      | <i>Total</i><br><i>(n= 73)</i> | <i>GDM</i><br><i>(n= 28)</i> | <i>Controls</i><br><i>(n=45)</i> | <i>p value</i> |
|-------------------------------------------------------|--------------------------------|------------------------------|----------------------------------|----------------|
| <i>First trimester Humanin (pg/mL), mean (SD)</i>     | 797.9±607.7                    | 817.4±740.9                  | 785.8±516.7                      | 0.507          |
| <i>First trimester Humanin (pg/mL), median (IQR)</i>  | 658.0 (455.0-905.0)            | 586.0 (422.5-980.0)          | 672.00 (515.0-859.0)             |                |
| <i>Second trimester Humanin (pg/ml), mean (SD)</i>    | 697.2±523.0                    | 593.3±501.0                  | 761.9±1205.9                     | 0.910          |
| <i>Second trimester Humanin (pg/ml), median (IQR)</i> | 523.0 (276.0-771.0)            | 501.0 (269.5-754.0)          | 536.0 (276.5-798.0)              |                |
| <i>First trimester MOTSc (ng/mL), mean (SD)</i>       | 725.1±332.8                    | 727.5±292.8                  | 723±358.6                        | 0.798          |
| <i>First trimester MOTSc (ng/mL), median (IQR)</i>    | 600.0 (473.7-973.2)            | 592.8 (513.5-1008.7)         | 658.8 (436.5-919.2)              |                |
| <i>Second trimester MOTSc (ng/ml), mean (SD)</i>      | 592.0±250.5                    | 554.2±236.5                  | 615.5±258.7                      | 0.571          |
| <i>Second trimester MOTSc (ng/ml), median (IQR)</i>   | 541.5 (435.1-673.8)            | 530.2 (430.6-607.5)          | 543.6 (439.8-784.8)              |                |
| <i>First trimester Glucose (mmol/l), mean (SD)</i>    | 4.3±0.3                        | 4.2±0.3                      | 4.4±0.3                          | 0.135          |
| <i>First trimester Glucose (mmol/l), median (IQR)</i> | 4.3 (4.0-4.6)                  | 4.3 (4.0-4.5)                | 4.3 (4.1-4.6)                    |                |
| <i>Second trimester Glucose (mmol/l), mean (SD)</i>   | 4.4±0.6                        | 4.6±0.8                      | 4.3±0.4                          | 0.181          |
| <i>Second trimester Glucose (mmol/l) median (IQR)</i> | 4.4 (4.0-4.6)                  | 4.4 (4.1-4.8)                | 4.3 (4.0-4.5)                    |                |
| <i>First trimester Insulin (μU/mL), mean (SD)</i>     | 8.2±4.5                        | 7.7±3.9                      | 8.5±4.8                          | 0.457          |
| <i>First trimester Insulin (μU/mL), median (IQR)</i>  | 7.3 (4.7-10.6)                 | 6.3 (4.4-10.9)               | 7.6 (5.3-9.9)                    |                |
| <i>Second trimester Insulin (μU/mL), mean (SD)</i>    | 11.1±10.1                      | 11.1±6.9                     | 11.0±11.7                        | 0.266          |
| <i>Second trimester Insulin (μU/mL), median (IQR)</i> | 9.4 (6.6-11.7)                 | 9.8 (8.0-12.1)               | 9.0 (5.9-11.2)                   |                |
| <i>First trimester HOMA-IR, mean (SD)</i>             | 1.6±0.9                        | 1.5±0.8                      | 1.7±1.0                          | 0.380          |
| <i>First trimester HOMA-IR, median (IQR)</i>          | 1.3 (0.9-2.0)                  | 1.2 (0.7-2.0)                | 1.5 (0.9-2.0)                    |                |
| <i>Second trimester HOMA-IR, mean (SD)</i>            | 2.3±2.5                        | 2.5±2.7                      | 2.1±2.4                          | 0.166          |
| <i>Second trimester HOMA-IR, median (IQR)</i>         | 1.8 (1.2-2.3)                  | 1.8 (1.5-2.5)                | 1.7 (1.0-2.2)                    |                |
| <i>First trimester HOMA-β (%), mean (SD)</i>          | 223.2±144.1                    | 234.5±151.9                  | 216.5±140.6                      | 0.646          |
| <i>First trimester HOMA-β (%), median (IQR)</i>       | 176.2 (125.1-277.9)            | 229.3 (113.4-278.2)          | 173.2 (126.2-278.8)              |                |
| <i>Second trimester HOMA-β (%), mean (SD)</i>         | 288.1±262.0                    | 277.4±265.1                  | 295.0±262.8                      | 0.432          |
| <i>Second trimester HOMA-β (%), median (IQR)</i>      | 208.0 (146.7-356.2)            | 195.0 (146.7-258.9)          | 220.0 (147.8-360.1)              |                |

GDM: Gestational diabetes mellitus. Comparisons across groups were performed by the Mann-Whitney U-test.

**Supplementary Table S2.** Crude and adjusted odds ratio and 95% CI

according to median mitochondrial-derived peptides on the risk of high HOMA-IR in the first (1T) and second trimesters (2T) of gestation.

| Biomarkers              | Cut-of points | HOMA-IR<br>low         | HOMA-IR<br>high        | Crude<br>OR | (95%<br>CI) | aOR <sup>a</sup> | (95%<br>CI) |  |
|-------------------------|---------------|------------------------|------------------------|-------------|-------------|------------------|-------------|--|
|                         |               | N=48 (1T)<br>N=49 (2T) | N=24 (1T)<br>N=23 (2T) |             |             |                  |             |  |
|                         |               |                        |                        |             |             |                  |             |  |
| <b>First trimester</b>  |               |                        |                        |             |             |                  |             |  |
| <b>Humanin</b>          |               |                        |                        |             |             |                  |             |  |
| <b>(pg/mL)</b>          |               |                        |                        |             |             |                  |             |  |
| <b>(Median)</b>         |               |                        |                        |             |             |                  |             |  |
| High (reference)        | 659+          | 27                     | 8                      | 1.00        |             | 1.00             |             |  |
| Low                     | ≤ 658         | 21                     | 16                     | 2.57        | 0.92 7.15   | 1.85             | 0.57 5.98   |  |
| <b>First trimester</b>  |               |                        |                        |             |             |                  |             |  |
| <b>MOTSc (ng/ml)</b>    |               |                        |                        |             |             |                  |             |  |
| <b>(Median)</b>         |               |                        |                        |             |             |                  |             |  |
| High (reference)        | 600.1+        | 25                     | 11                     | 1.00        |             | 1.00             |             |  |
| Low                     | ≤ 600.0       | 23                     | 13                     | 1.28        | 0.48 3.43   | 2.47             | 0.72 8.52   |  |
| <b>Second trimester</b> |               |                        |                        |             |             |                  |             |  |
| <b>Humanin</b>          |               |                        |                        |             |             |                  |             |  |
| <b>(pg/mL)</b>          |               |                        |                        |             |             |                  |             |  |
| <b>(Median)</b>         |               |                        |                        |             |             |                  |             |  |
| High (reference)        | 524+          | 30                     | 6                      | 1.00        |             | 1.00             |             |  |
| Low                     | ≤ 523         | 19                     | 17                     | 4.47        | 1.50 13.36  | 2.12             | 0.60 7.46   |  |
| <b>Second</b>           |               |                        |                        |             |             |                  |             |  |
| <b>trimester</b>        |               |                        |                        |             |             |                  |             |  |
| <b>MOTSc (ng/ml)</b>    |               |                        |                        |             |             |                  |             |  |
| <b>(Median)</b>         |               |                        |                        |             |             |                  |             |  |
| High (reference)        | 541.6+        | 27                     | 8                      | 1.00        |             | 1.00             |             |  |
| Low                     | ≤ 541.5       | 22                     | 15                     | 2.30        | 0.82 6.42   | 3.82             | 1.02 14.24  |  |

Note: One case was excluded because of missing insulin values in the first trimester, and one control was excluded because of missing glucose values in the second trimester.

High HOMA-IR was considered ≥ 70th percentile of its distribution (≥ 2.28).

<sup>a</sup>aOR= Odds ratios adjusted for maternal age, BMI and smoking habit.

**Supplementary Table S3.** Spearman rank correlation bivariate analysis of variables associated with HOMA-IR in the first and second trimesters of gestation separately.

|                              | <i>First Trimester</i> |          | <i>Second Trimester</i> |                |
|------------------------------|------------------------|----------|-------------------------|----------------|
|                              | <i>r</i>               | <i>p</i> | <i>r</i>                | <i>p value</i> |
| <b><i>BMI</i></b>            | 0.513**                | <0.0001  | 0.433**                 | 0.0001         |
| <b><i>Age</i></b>            | 0.009                  | 0.942    | 0.179                   | 0.133          |
| <b><i>Humanin</i></b>        | -0.324**               | 0.005    | 0.186                   | 0.118          |
| <b><i>MOTSc</i></b>          | 0.037                  | 0.759    | -0.086                  | 0.471          |
| <b><i>Humanin Change</i></b> | 0.189                  | 0.113    | -0.059                  | 0.622          |
| <b><i>MOTSc Change</i></b>   | 0.165                  | 0.166    | 0.262*                  | 0.026          |

\*2-tailed correlation significance,  $p < 0.05$ . \*\* 2-tailed correlation significance,  $p < 0.01$ .

**Supplementary table S4.** Association between changes in levels of mitochondrial-derived peptides throughout pregnancy and the HOMA-IR index.

| MDPs Change               | Cutoff points | HOMA-IR low | HOMA-IR high | Crude OR | (95% CI)  | aOR <sup>a</sup>  | (95% CI)   |
|---------------------------|---------------|-------------|--------------|----------|-----------|-------------------|------------|
|                           |               | N=49        | N=23         |          |           |                   |            |
| Change in Humanin (pg/mL) |               |             |              |          |           |                   |            |
| Low (reference)           | ≤ 122.00      | 25          | 11           | 1.00     |           | 1.00              |            |
| High (above median)       | 123.00+       | 24          | 12           | 1.14     | 0.42 3.06 | 1.71              | 0.51 5.73  |
| Change in MOTSc (pg/mL)   |               |             |              |          |           |                   |            |
| Low (reference)           | ≤ 52.80       | 28          | 8            | 1.00     |           | 1.00              |            |
| High (above median)       | 52.81+        | 21          | 15           | 2.50     | 0.89 6.99 | 3.73 <sup>b</sup> | 1.03 13.50 |

Note: One control was excluded because of missing glucose values in the second trimester.

High HOMA-IR was considered ≥ 70th percentile of its distribution (≥ 2.28).

<sup>a</sup> aOR= Odds ratios adjusted for maternal age, BMI and smoking habit.

<sup>b</sup> *p* value=0.045.

**Supplementary table S5.** Association between changes in levels of mitochondrial-derived peptides throughout pregnancy and the occurrence of gestational diabetes mellitus (GDM).

| MDPs                                   | Cutoff points | Controls | GDM  | Crude OR | (95% CI)  | aOR <sub>a</sub> | (95% CI)  |  |  |
|----------------------------------------|---------------|----------|------|----------|-----------|------------------|-----------|--|--|
|                                        |               | N=45     | N=28 |          |           |                  |           |  |  |
| First trimester                        |               |          |      |          |           |                  |           |  |  |
| Humanin (pg/mL) (Median)               |               |          |      |          |           |                  |           |  |  |
| High (reference)                       | 659+          | 24       | 12   | 1.00     |           | 1.00             |           |  |  |
| Low                                    | ≤ 658         | 21       | 16   | 1.52     | 0.59 3.94 | 1.44             | 0.54 3.85 |  |  |
| First trimester MOTSc (ng/ml)(Median)  |               |          |      |          |           |                  |           |  |  |
| High (reference)                       | 600.1+        | 23       | 13   | 1.00     |           | 1.00             |           |  |  |
| Low                                    | ≤ 600.0       | 22       | 15   | 1.21     | 0.47 3.10 | 1.35             | 0.50 3.63 |  |  |
| Second trimester                       |               |          |      |          |           |                  |           |  |  |
| Humanin (pg/mL) (Median)               |               |          |      |          |           |                  |           |  |  |
| High (reference)                       | 524+          | 23       | 13   | 1.00     |           | 1.00             |           |  |  |
| Low                                    | ≤ 523         | 22       | 15   | 1.21     | 0.47 3.10 | 1.23             | 0.46 3.28 |  |  |
| Second trimester MOTSc (ng/ml)(Median) |               |          |      |          |           |                  |           |  |  |
| High (reference)                       | 541.6+        | 23       | 13   | 1.00     |           | 1.00             |           |  |  |
| Low                                    | ≤ 541.5       | 22       | 15   | 1.21     | 0.47 3.10 | 1.23             | 0.46 3.28 |  |  |
| Change in Humanin (pg/mL)              |               |          |      |          |           |                  |           |  |  |
| Low (reference)                        | ≤ 122.00      | 24       | 13   | 1.00     |           | 1.00             |           |  |  |
| High (above median)                    | 123.00+       | 21       | 15   | 1.32     | 0.51 3.40 | 1.34             | 0.50 3.56 |  |  |
| Change in MOTSc (pg/mL)                |               |          |      |          |           |                  |           |  |  |
| Low (reference)                        | ≤ 52.80       | 24       | 13   | 1.00     |           | 1.00             |           |  |  |
| High (above median)                    | 52.81+        | 21       | 15   | 1.32     | 0.51 3.40 | 1.34             | 0.50 3.56 |  |  |

<sup>a</sup>aOR= Odds ratios adjusted for maternal age, BMI and smoking habit.

**Supplementary Figure S1.** Receiver operating characteristic (ROC) curve for mitochondrial-derived peptides (MDPs): (a) in the first (1T) and second trimesters (2T), and (b) changes across gestation built on gestational diabetes mellitus (GDM).

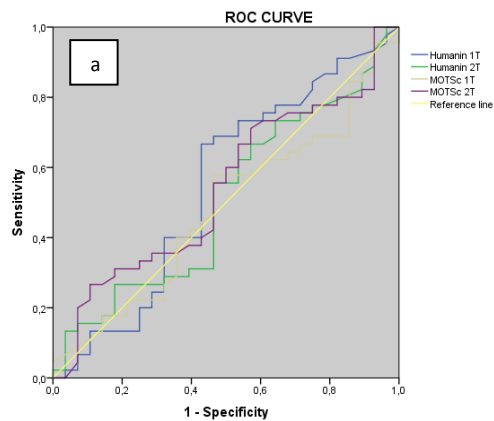

Humanin 1T: AUC 0.546; 95%CI (0.403-0.690);  
Humanin 2T: AUC 0.508; 95%CI (0.370-0.646)  
MOTSc 1T: AUC 0.482; 95%CI (0.346-0.618)  
MOTSc 2T: AUC 0.540 (0.403-0.676)

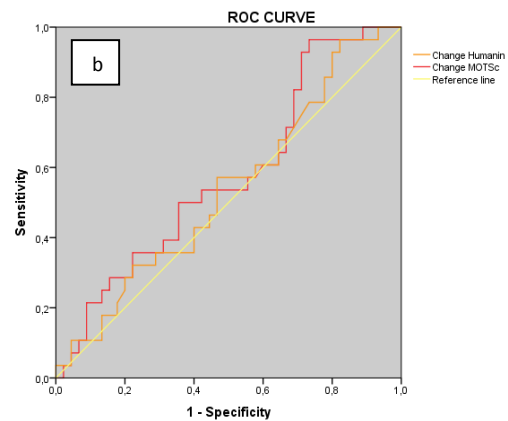

Change Humanin: AUC 0.537; 95%CI (0.402-0.673)  
Change MOTSc: AUC 0.576; 95%CI (0.442-0.710)
